# Supplementary material for: Occupational medical prophylaxis for the musculoskeletal system: A function-oriented system for physical examination of the locomotor system in occupational medicine (fokus(C))
Source: PubMed Central journal article supplement (PMC2174926; doi:10.1186/1745-6673-2-12), 2007-10-29

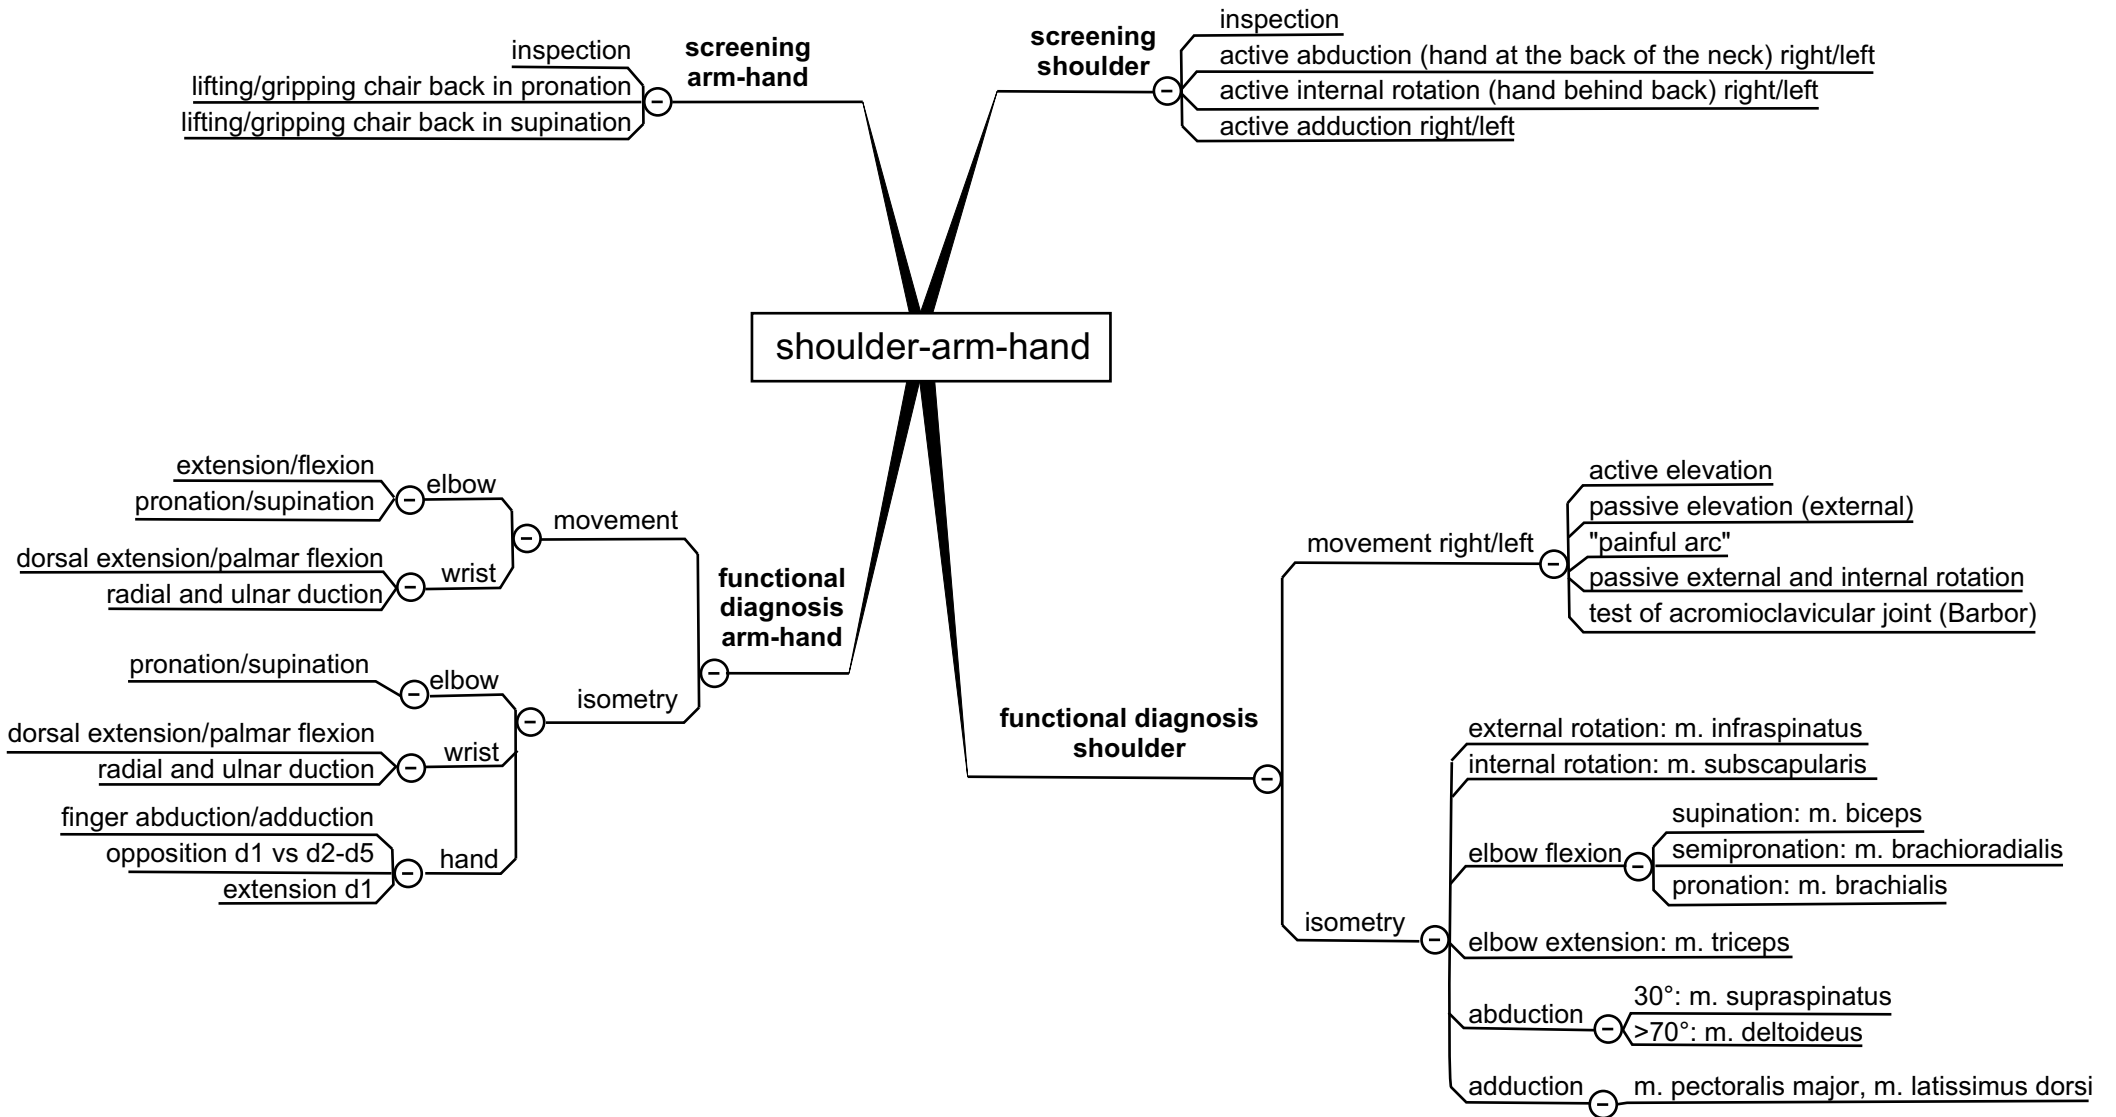

Supplement: 1745-6673-2-12-S2.pdf [file 1745-6673-2-12-S2.pdf]
